# Supplementary material for: Efficient charge separation and transfer of a TaON/BiVO4 heterojunction for photoelectrochemical water splitting
Source: Royal Society of Chemistry journal article supplement (doi:10.1039/d1ra00974e), 2021-01-01
Supplement: d1ra00974e1.pdf [file d1ra00974e1.pdf]

## Supporting Information

### Efficient charge separation and transfer of TaON/BiVO<sub>4</sub> heterojunction for photoelectrochemical water splitting

Na Li <sup>a, b</sup>, Yi Jiang <sup>a\*</sup>, Xiaodi Wang <sup>a</sup>, Chongyang Hu <sup>a</sup>, Wenchao Jiang <sup>a</sup>, Siyuan Li <sup>a</sup>, and Lixin Xia <sup>a, b\*</sup>

a. College of Chemistry, Liaoning University, Shenyang 110036, Liaoning, China.

b. Department of Chemical and Environmental Engineering, Yingkou Institute of Technology, Yingkou, 115014, Liaoning, China.

†E-mail address: jiangyi@lnu.edu.cn; lixinxia@lnu.edu.cn.

#### Materials

Ta<sub>2</sub>O<sub>5</sub>, Bi(NO<sub>3</sub>)<sub>3</sub>·5H<sub>2</sub>O, VO(acac)<sub>2</sub> and p-benzoquinone were purchased from Aladdin-Reagent. All other reagents were used as purchased without further purification. The Glass slides coated with fluorine-doped tin oxide (FTO) purchased from Zhuhai Kaivo Optoelectronic Technology. FTO was cleaned by ultrasonication in ethanol, DI water and acetone before used as a substrate for the thin films.

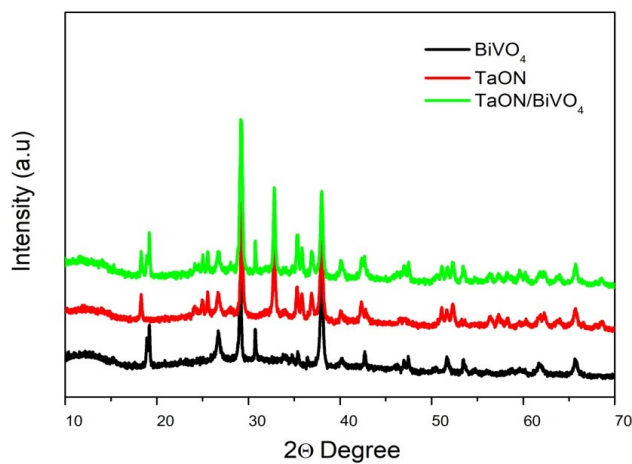

**Fig. S1** XRD patterns of BiVO<sub>4</sub>, the TaON and TaON/BiVO<sub>4</sub> electrodes.

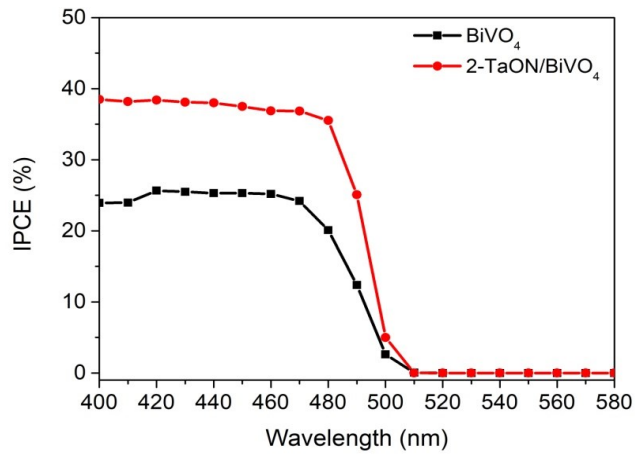

**Fig. S2** The IPCE spectra of the sample electrodes.

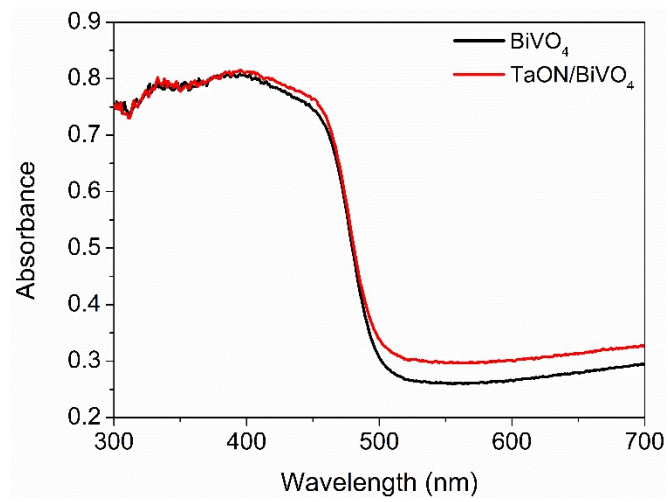

**Fig. S3** UV-Vis absorption spectra of the sample electrodes.

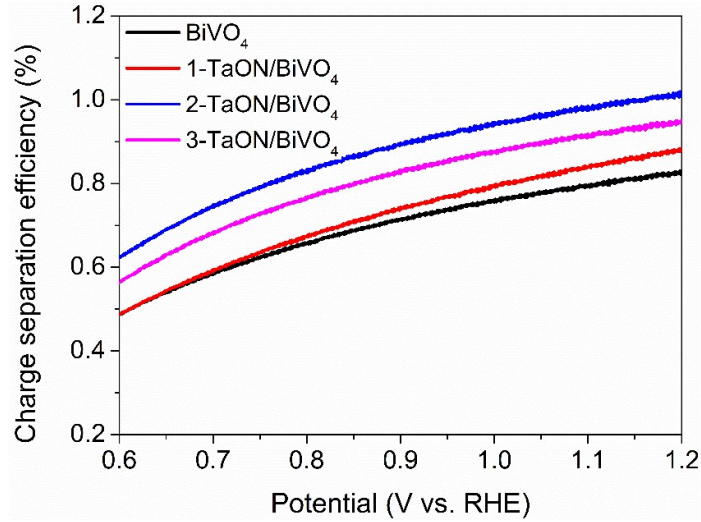

**Fig. S4** The charge separation efficiency of different electrodes.

To calculate  $J_{\text{abs}}$  (the photocurrent density when the absorbed photons completely convert into photocurrent), the reference solar spectral irradiance at AM 1.5 G was converted to the solar energy spectrum in terms of number of photons vs. wavelength. Then, according to the UV-Vis absorption (Fig S3), the number of photons that  $\text{BiVO}_4$  can effectively absorb was calculated using a trapezoidal integration (in 1 nm increments) of the spectrum and was converted to the current density ( $\text{mA}\cdot\text{cm}^{-2}$ ).<sup>[1,2]</sup> Using these calculations,  $J_{\text{abs}} = 5.6 \text{ mA}/\text{cm}^2$  was obtained (The effects of all electrodes calculated by this method are similar, so we uniformly take the value of  $5.6 \text{ mA}/\text{cm}^2$ ). The photocurrent density arising from PEC water oxidation can be described as:  $J_{\text{H}_2\text{O}} = J_{\text{abs}} \times \eta_{\text{sep}} \times \eta_{\text{trans}}$ , where:  $\eta_{\text{sep}}$  is the charge separation efficiency, and  $\eta_{\text{trans}}$  is the charge injection efficiency. With  $\text{Na}_2\text{SO}_3$  as a hole scavenger, the surface recombination is eliminated,  $\eta_{\text{trans}} = 1$ , and the photocurrent can be described as:  $J_{\text{Na}_2\text{SO}_3} = J_{\text{abs}} \times \eta_{\text{sep}}$ . So the  $\eta_{\text{sep}}$  can describe as:  $\eta_{\text{sep}} = J_{\text{Na}_2\text{SO}_3} / J_{\text{abs}}$ .

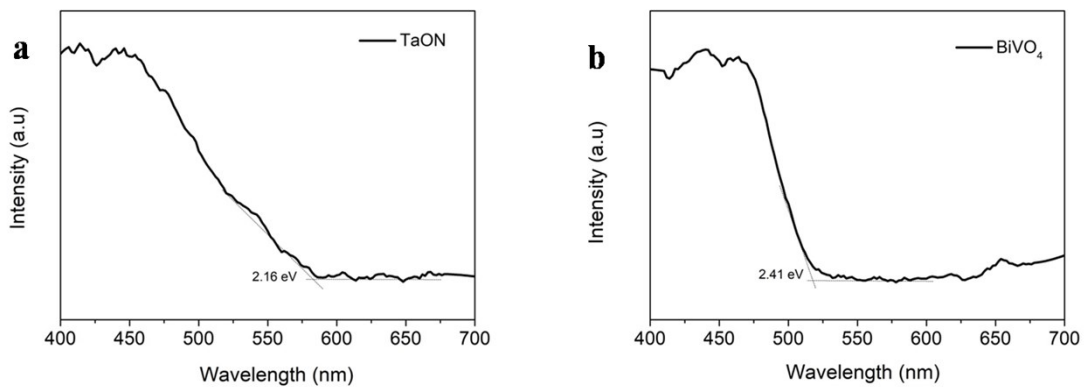

**Fig. S5** UV-Vis absorption spectra of TaON and  $\text{BiVO}_4$

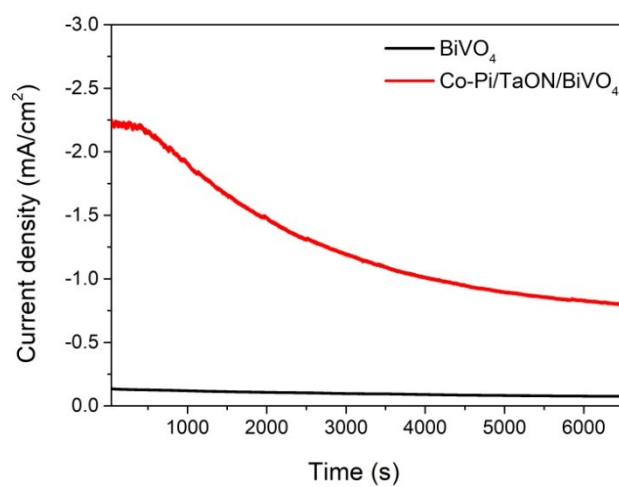

**Fig. S6** I-t curves of the  $\text{BiVO}_4$ ,  $\text{Co-Pi/TaON/BiVO}_4$  electrodes at 0.8 V vs. RHE.

Table S1. The interface charge transfer resistance ( $R(\text{ct})$ ) of different electrodes.

| Electrodes     | $\text{BiVO}_4$ | 1-TaON/ $\text{BiVO}_4$ | 2-TaON/ $\text{BiVO}_4$ | 3-TaON/ $\text{BiVO}_4$ |
|----------------|-----------------|-------------------------|-------------------------|-------------------------|
| $R(\text{ct})$ | 329             | 219                     | 203                     | 212                     |

[1] T. W. Kim and K.-S. Choi, *Science*, 2014, 343, 990-994.

[2] D. Zhou, K. Fan, Q. Zhuo, Y. Zhao, and L. Sun, *ACS Appl. Mater. Interfaces*, 2021, 13, 2723–2733.
